# Supplementary material
Source: HighWire-hosted journal article supplement (doi:10.1101/rna.033621.112)
Supplement: SuppTableLegends.docx [file SuppTableLegends.docx]

Supplemental Table 1 – Alternative splicing events detected by SplicerEX between LCL vs. resting B cells using the Affymetrix U133 microarray platform.

Supplemental Table 2 – Alternative splicing events detected by SplicerEX between LCL vs. resting B cells using the Affymetrix HuEx microarray platform.

Supplemental Table 3 - Alternative splicing events detected by SplicerEX between KSHV vs. mock infected lymphatic endothelial cells by HuEx platform (Chang 2011 data).

Supplemental Table 4 – March 2006 UCSC genomic coordinates of Affymetrix U133 microarray platform probesets.
